# Supplementary material for: pH-Responsive carbon dots with red emission for real-time and visual detection of amines
Source: Royal Society of Chemistry journal article supplement (doi:10.1039/d0tc02597f), 2020-01-01
Supplement: d0tc02597f1.pdf [file d0tc02597f1.pdf]

## pH-responsive carbon dots with red emission for real-time and visual detection of amines

Xiaoqin Zhang<sup>a</sup>, Chongyuan Chen<sup>a</sup>, Dongping Peng<sup>a</sup>, Yizi Zhou<sup>a</sup>, Jianle Zhuang<sup>a, b</sup>, Xuejie Zhang<sup>a</sup>,

<sup>b</sup>, Bingfu Lei<sup>a, b</sup>, Yingliang Liu<sup>a, b\*</sup> and Chaofan Hu<sup>a, b\*</sup>

<sup>a</sup> Key Laboratory for Biobased Materials and Energy of Ministry of Education/Guangdong Provincial Engineering Technology Research Center for Optical Agriculture, College of Materials and Energy, South China Agricultural University, Guangzhou, 510642, China

<sup>b</sup> Guangdong Laboratory of Lingnan Modern Agriculture, Guangzhou, 510642, China

\*Corresponding author.

Email address: [tliuyl@scau.edu.cn](mailto:tliuyl@scau.edu.cn) (Y. L. Liu)

[thucf@scau.edu.cn](mailto:thucf@scau.edu.cn) (C. F. Hu)

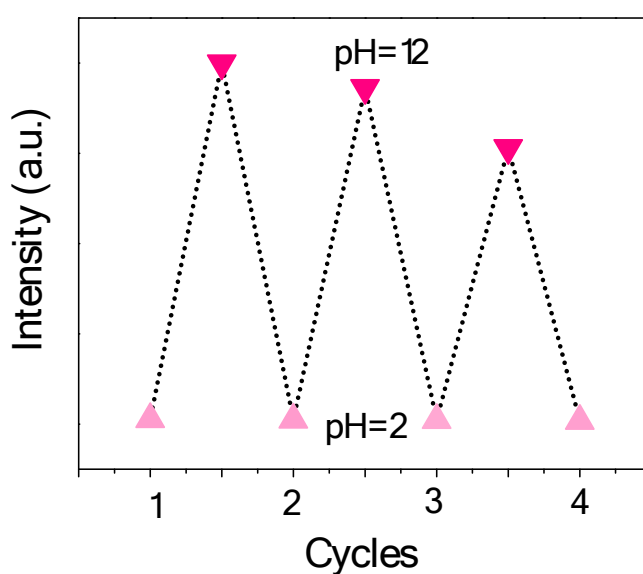

Figure S1. Reversibility study of PL emission of R-CDs between pH 2 and 12.

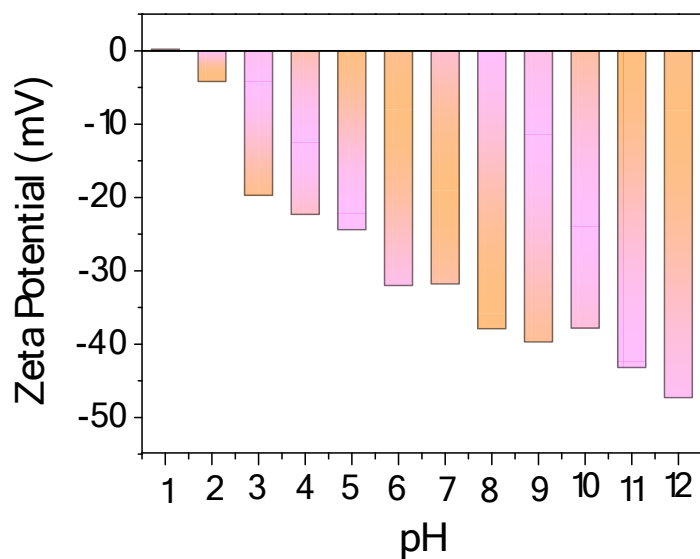

Figure S2. The zeta potential of the R-CDs with varying the pH value from 1 to 12.

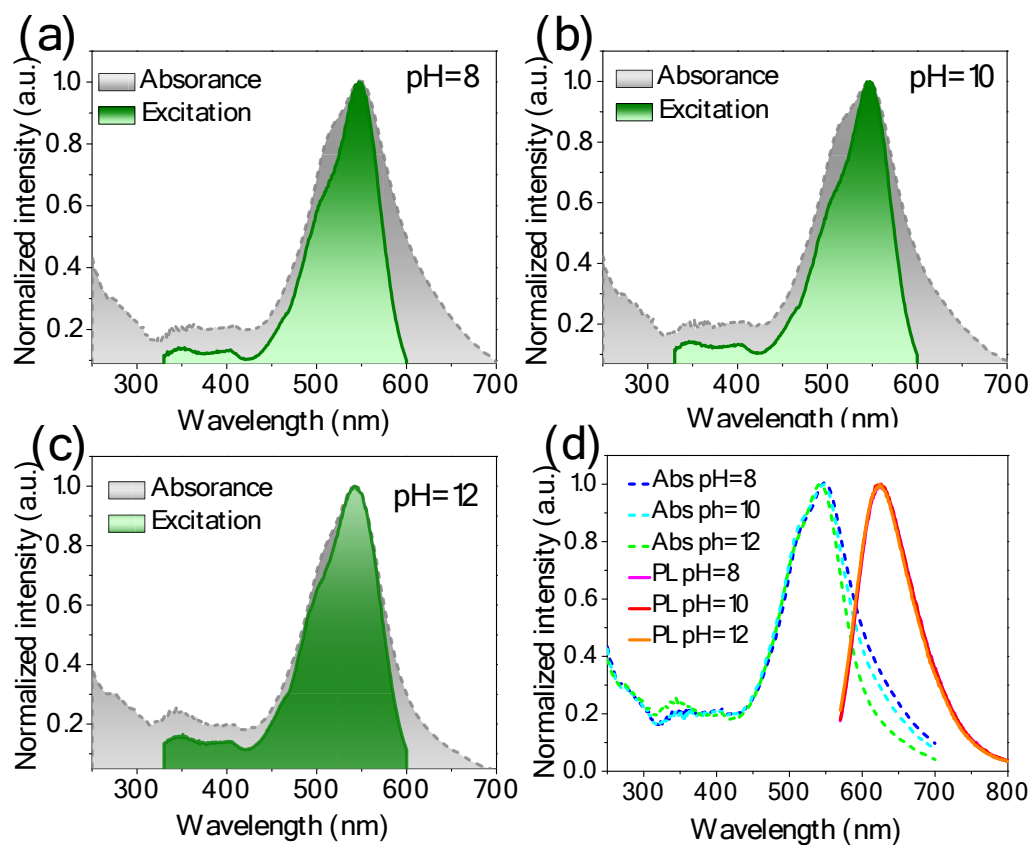

Figure S3. (a) UV-vis absorption, PL excitation (620 nm emission) of R-CDs at pH 8. (b) UV-vis absorption, PL excitation (620 nm emission) of R-CDs at pH 10. (c) UV-vis absorption, PL excitation (620 nm emission) of R-CDs at pH 12. (d) UV-vis absorption spectra and PL spectra (550 nm excitation) of R-CDs at pH 8, 10 and 12.

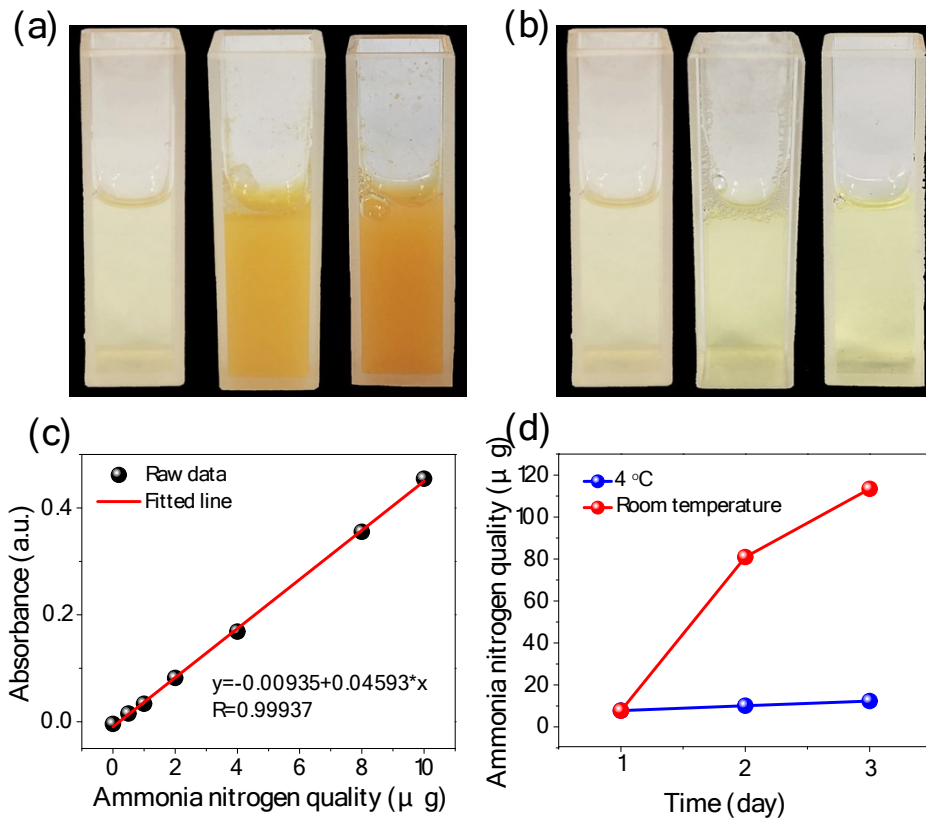

Figure S4. Monitoring of the ammonia nitrogen contents in shrimps meat infusion with Nessler reagent. (a) Images of Nessler reagent for monitoring the ammonia nitrogen contents in shrimps stored at room temperature. (b) Images of Nessler reagent for monitoring the ammonia nitrogen contents in shrimps stored at 4 °C. (c) Standard curve of ammonia nitrogen quality. (d) The quality of ammonia nitrogen produced by 5 g shrimp placed at 4 °C and room temperature for different days.
